# Supplementary material
Source: PubMed Central journal article supplement (PMC7793634)

## First Author Bio

Leonie Durnin obtained a BSc degree in Biology from the University of Ulster, Coleraine, Northern Ireland (2007) and a PhD in Physiology and Cell Biology from the University of Nevada Reno (2013) in the group of Prof. Violeta Mutafova-Yambolieva where she received extensive training in mechanisms of purinergic neurotransmission. She then undertook postdoctoral training in the same group expanding her expertise to novel approaches of studying enteric neurotransmitters in the large intestine and purine-mediated regulation of bladder physiology. Dr. Durnin is currently involved in preclinical research studies assessing the safety and efficacy of novel drug candidates to treat human pathologies.

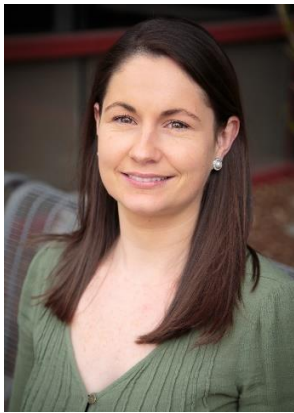

Supplement: NIHMS1644892-supplement-Supplementary_Info_-1.pdf [file NIHMS1644892-supplement-Supplementary_Info_-1.pdf]
