# Supplementary material
Source: PubMed Central journal article supplement (PMC7793634)
Supplement: NIHMS1644892-supplement-Supplementary_Info_-2.pdf [file NIHMS1644892-supplement-Supplementary_Info_-2.pdf]

# The Journal of Physiology Statistical Summary Document

---

**Manuscript Title:** Extracellular metabolism of the enteric inhibitory neurotransmitter  $\beta$ -nicotinamide adenine dinucleotide ( $\beta$ -NAD) in the murine colon

**Authors:** Leonie Durnin, Masaaki Kurahashi, Kenton M. Sanders and Violeta N. Mutafova-Yambolieva\*

**Animal model used, if applicable:** C57BL/6 mice (Wildtype, WT), Cd38-KO mice, Nt5e-KO mice, Cd38-KO/ Nt5e-KO knockout mice, Enpp1-KO mice, FACS-purified SMCs, ICC, and PDGFR $\alpha$ + cells

**Underlying hypothesis:**

Hypothesis 1: The enteric neurotransmitter  $\beta$ -NAD is metabolized to ADPR by CD38, to AMP by ENPP1, and to adenosine (ADO) by NT5E in the mouse colon muscularis.  
Hypothesis 2:  $\beta$ -NAD metabolizing enzyme activities are differentially distributed in smooth muscle cells (SMC), interstitial cells of Cajal (ICC), and cells expressing platelet-derived growth factor receptor  $\alpha$  (PDGFR $\alpha$ + cells) in the mouse colon muscularis.

**Definitions of 'n':** [Define 'n'. If definitions differ, please indicate which definition applies to which experimental question number.]

'n' = number of observations

One observation is made per one superfusion chamber. In experiments with colon muscularis (Q1-6) each superfusion chamber contained colon tissue preparations from 2 mice. In experiments with FACS-purified cells (Q7-11) each superfusion chamber contained 35,000-62,000 cells isolated from 4-5 mouse colons.

All data are expressed as Mean  $\pm$  SD. The actual values of mean, SD, and P are found in Results in main text.

**Experimental questions:**

**Q1:** Does tunica muscularis of the murine colon exhibit the machinery for NAD degradation to ADPR, AMP and ADO?

**Q2:** Does deletion of *Cd38* inhibit the formation of eADPR, eAMP and eADO from eNAD in the murine colon muscularis?

**Q3:** Does deletion of *Enpp1* inhibit the formation of eAMP and eADO from eNAD in the murine colon muscularis?

**Q4:** Does deletion of *Nt5e* inhibit the degradation of the eNAD product eAMP to eADO?

**Q5:** Does deletion of both *Cd38* and *Nt5e* result in inhibited formation of eADPR and eADO from eNAD and in accumulation of eAMP?

**Q6:** What roles do CD38, NT5E and ENPP play in the NAD metabolism in the murine colon tunica muscularis?

**Q7:** Can eNAD metabolism to eADPR, eAMP and eADO be detected in freshly dispersed cells of murine colon muscularis?

**Q8:** Are SMCs in mouse colon muscularis equipped to metabolize NAD to ADPR, AMP and adenosine?

**Q9:** Are ICC in mouse colon muscularis equipped to metabolize NAD to ADPR, AMP and adenosine?

**Q10:** Are PDGFR $\alpha$ + cells in mouse colon muscularis equipped to metabolize NAD to ADPR, AMP and adenosine?

**Q11:** Do SMCs, ICC and PDGFR $\alpha$ + cells of colon muscularis have similar capacity to metabolize NAD?

# The Journal of Physiology Statistical Summary Document

## Statistical summary table:

| Experimental question number* | Finding/conclusion                                                                                          | Experimental location/variable<br>e.g. cortex vs cerebellum or genotype | Mean value<br>(or other summary statistic) | SD | n (value)                    | P** | Units          | Data comparisons<br>e.g. WT vs KO                         | Statistical test                                                                 | Any other variable<br>e.g. subjects' age or sex | Figure/table in which data are presented | Comments<br>e.g. observation                                                                                                                                     |
|-------------------------------|-------------------------------------------------------------------------------------------------------------|-------------------------------------------------------------------------|--------------------------------------------|----|------------------------------|-----|----------------|-----------------------------------------------------------|----------------------------------------------------------------------------------|-------------------------------------------------|------------------------------------------|------------------------------------------------------------------------------------------------------------------------------------------------------------------|
| 1.                            | eNAD is degraded to eADPR, eAMP and eADO in colon tissue of WT mice.                                        | WT colon vs. no tissue                                                  | -                                          | -  | 22 (-tissue)<br>12 (+tissue) | -   | fmol/mg tissue | eNAD (-tissue) vs. eNAD (+tissue, WT)                     | One-way ANOVA with Dunnett's multiple comparison test (GraphPad Prism, v. 8.3.0) |                                                 | Fig. 2                                   | Data for substrate in no contact with tissue (- tissue) is common for WT and KO tissue preparations (n = 22) and is used in multiple comparison analyses (Q1-6). |
| 2                             | CD38 mediates the metabolism of NAD to ADPR; NAD can also be degraded to AMP by an alternative pathway that | <i>Cd38</i> -KO colon vs. no tissue                                     | -                                          | -  | 6                            | -   | fmol/mg tissue | eNAD (-tissue) vs. eNAD (+tissue, WT vs. <i>Cd38</i> -KO) | One-way ANOVA with Dunnett's multiple comparison test                            |                                                 | Fig. 2                                   | In the absence of <i>Cd38</i> , eNAD failed to form eADPR, but produced eAMP and eADO.                                                                           |

The Journal of  
**Physiology** Statistical Summary Document

|   |                                                                                             |                                                      |   |   |    |   |                |                                                            |                                                       |  |        |                                                                                                                                                                      |
|---|---------------------------------------------------------------------------------------------|------------------------------------------------------|---|---|----|---|----------------|------------------------------------------------------------|-------------------------------------------------------|--|--------|----------------------------------------------------------------------------------------------------------------------------------------------------------------------|
|   | does not involve CD38.                                                                      |                                                      |   |   |    |   |                |                                                            |                                                       |  |        |                                                                                                                                                                      |
| 3 | ENPP1 mediates the formation of AMP from either ADPR or NAD.                                | <i>Enpp1</i> -KO colon vs. no tissue                 | - | - | 3  | - | fmol/mg tissue | eNAD (-tissue) vs. eNAD (+tissue, WT vs. <i>Enpp1</i> -KO) | One-way ANOVA with Dunnett's multiple comparison test |  | Fig. 2 | Deletion of <i>Enpp1</i> resulted in accumulation of eADPR and decreased formation of eAMP and eADO from eNAD.                                                       |
| 4 | NT5E mediates the degradation of eAMP to eADO in colon muscularis.                          | <i>Nt5e</i> -KO colon vs. no tissue                  | - | - | 12 | - | fmol/mg tissue | eNAD (-tissue) vs. eNAD (+tissue, WT vs. <i>Nt5e</i> -KO)  | One-way ANOVA with Dunnett's multiple comparison test |  | Fig. 2 | In colon muscularis from <i>Nt5e</i> -KO mice, eNAD metabolism resulted in increased amounts of eAMP and decreased formation of eADO when compared with WT controls. |
| 5 | In colon muscularis, eNAD is degraded to ADPR by CD38 and eAMP is degraded to eADO by Nt5E. | <i>Cd38</i> -KO/ <i>Nt5e</i> -KO colon vs. no tissue | - | - | 8  | - | fmol/mg tissue | eNAD (-tissue) vs. eNAD (+tissue, WT vs. double-KO)        | One-way ANOVA with Dunnett's multiple comparison test |  | Fig. 2 | In colon muscularis lacking both CD38 and <i>Nt5e</i> , the degradation of eNAD resulted in reduced formation of eADPR and eADO, but increased amounts of eAMP.      |

The Journal of  
**Physiology** Statistical Summary Document

|   |                                                                                                                         |                                                                                       |   |   |                     |   |                 |                                                                                                            |                                                       |  |        |                                                                                                                        |
|---|-------------------------------------------------------------------------------------------------------------------------|---------------------------------------------------------------------------------------|---|---|---------------------|---|-----------------|------------------------------------------------------------------------------------------------------------|-------------------------------------------------------|--|--------|------------------------------------------------------------------------------------------------------------------------|
| 6 | In colon muscularis, eNAD is degraded to ADPR by CD38, to AMP by Enpp1, and to eAMP by NT5E.                            | Tissues of WT, Cd38-KO, Enpp1-KO, Nt5e-KO, Cd38-KO/Nt5e-KO mouse colons vs. no tissue | - | - | 22, 12, 6, 3, 12, 8 | - | fmol/mg tissue  | eNAD (-tissue) vs. eNAD (+tissue, WT vs. <i>Cd38</i> -KO vs. <i>Nt5e</i> -KO vs. <i>Enpp1</i> -KO vs. DKO) | One-way ANOVA with Dunnett's multiple comparison test |  | Fig. 2 | Observations described in Q1-5.                                                                                        |
| 7 | eNAD metabolism to eADPR, eAMP, and eADO can be successfully detected in freshly dispersed cells from colon muscularis. | Cells vs. no cells                                                                    | - | - | 12                  | - | fmol/1000 cells | eNAD (-cells) vs. eNAD (+cells)                                                                            | Paired, two-tailed t-test                             |  | Fig. 4 | Superfusion of freshly dispersed cells with eNAD resulted in the appearance of the eNAD products eADPR and eADO.       |
| 8 | SMCs do not express CD38, but express high activity of NT5E.                                                            | Cells vs. no cells                                                                    | - | - | 4                   | - | fmol/1000 cells | eNAD (-cells) vs. eNAD (+cells)                                                                            | One-way ANOVA with Dunnett's multiple comparison test |  | Fig. 5 | Superfusion of purified SMCs with eNAD did not result in formation of eADPR, but produced significant amounts of eADO. |

# The Journal of Physiology Statistical Summary Document

|    |                                                                                                                           |                                                       |   |   |             |   |                 |                                                                     |                                                       |  |        |                                                                                                                                                                                    |
|----|---------------------------------------------------------------------------------------------------------------------------|-------------------------------------------------------|---|---|-------------|---|-----------------|---------------------------------------------------------------------|-------------------------------------------------------|--|--------|------------------------------------------------------------------------------------------------------------------------------------------------------------------------------------|
| 9  | ICCs are not equipped to metabolize NAD.                                                                                  | Cells vs. no cells                                    | - | - | 4           | - | fmol/1000 cells | eNAD (-cells) vs. eNAD (+cells)                                     | One-way ANOVA with Dunnett's multiple comparison test |  | Fig. 5 | Superfusion of purified ICC with eNAD resulted in no formation of eADPR or eADO.                                                                                                   |
| 10 | PDGFR $\alpha$ + cells do not express CD38, but express NT5E.                                                             | Cells vs. no cells                                    | - | - | 4           | - | fmol/1000 cells | eNAD (-cells) vs. eNAD (+cells)                                     | One-way ANOVA with Dunnett's multiple comparison test |  | Fig. 5 | Superfusion of PDGFR $\alpha$ + cells with eNAD resulted in no formation of eADPR and in production of eADO.                                                                       |
| 11 | SMCs, ICC, and PDGFR $\alpha$ + cells play differential roles in the extracellular metabolism of NAD in the murine colon. | SMCs vs. ICC. vs. PDGFR $\alpha$ + cells vs. no cells | - | - | 12, 4, 4, 4 | - | fmol/1000 cells | eNAD (-cells) vs. eNAD (+SMCs vs. +ICC vs. +PDGFR $\alpha$ + cells) | One-way ANOVA with Dunnett's multiple comparison test |  | Fig. 5 | SMCs, ICC, and PDGFR $\alpha$ + cells do not express CD38. SMCs express high amounts of Nt5e, PDGFR $\alpha$ + cells express moderate amounts of Nt5e, and ICC lack Nt5e activity. |

\*You may use multiple lines for the same question to indicate multiple comparisons

\*\* Authors may wish to make the text bold where p is considered significant against a stated confidence limit
